# Supplementary material
Source: ML conference proceedings conference paper supplement (https://openaccess.thecvf.com/content/cvpr_2016/html/Schonberger_Structure-From-Motion_Revisited_2016_CVPR_paper.html)
Supplement: Supplementary file 2 [file Schonberger_Structure-From-Motion_Revisited_2016_CVPR_supplemental.zip]

Archive with 2 entries (2 files):
- video.mp4
- doc.pdf
